# Supplementary material
Source: Springer Nature journal article supplement (https://www.springermedizin.de/resource/supplementary/12936_2010_1399_MOESM3_ESM.pdf/9549702)

**a**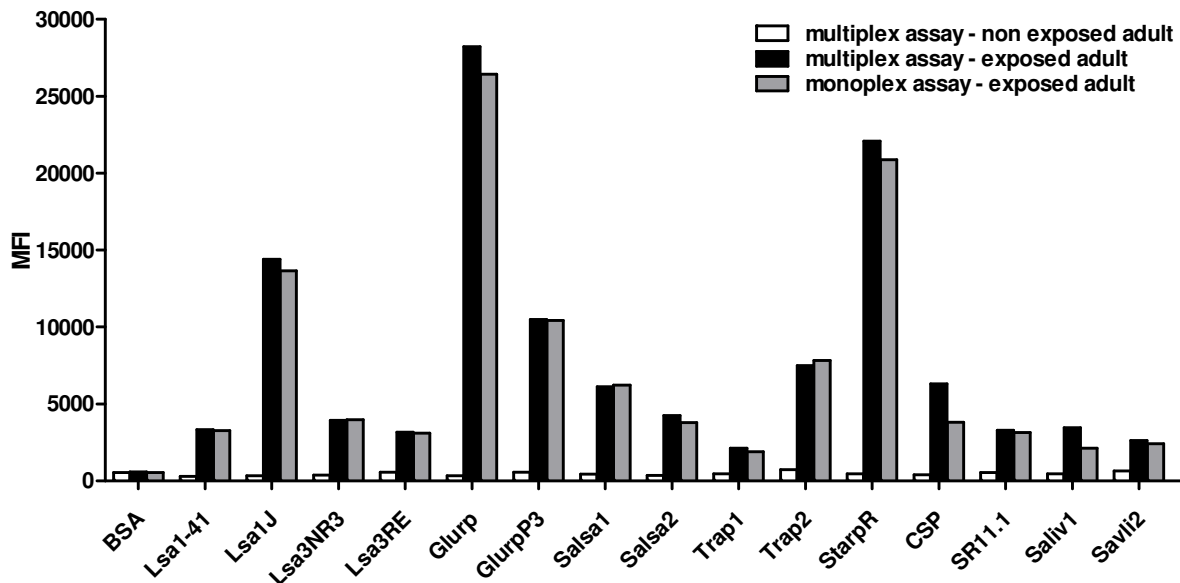**b**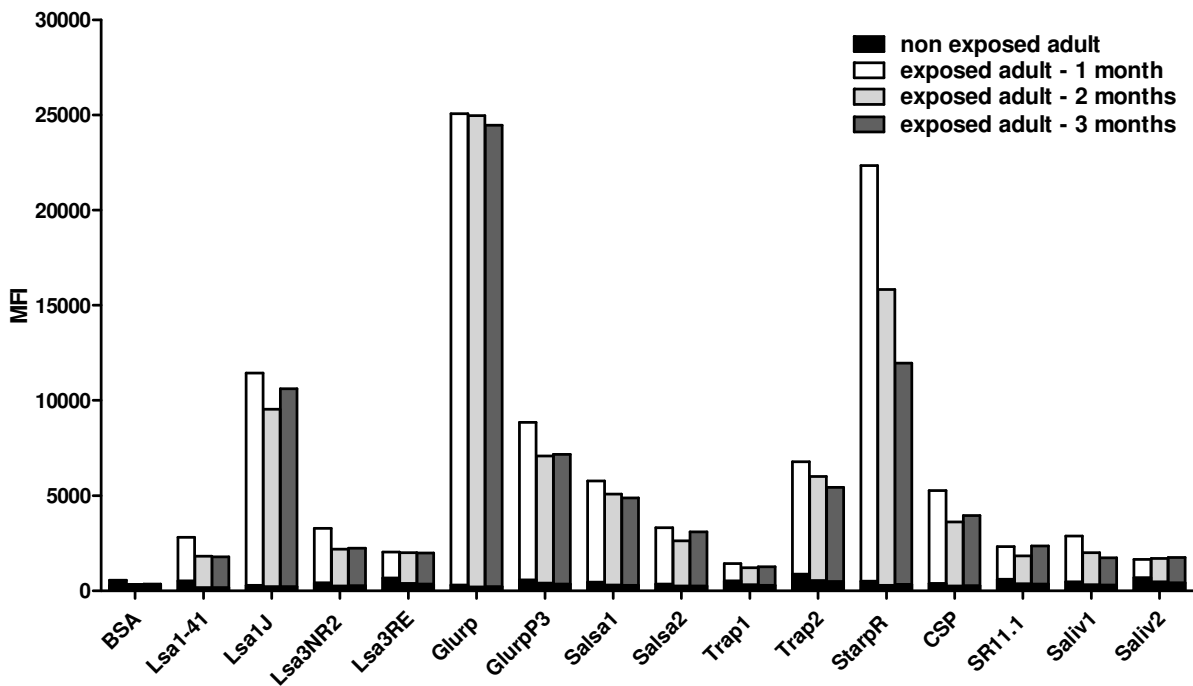

Supplement: MOESM3 [file 9549702]
